# Supplementary material
Source: PubMed Central journal article supplement (PMC3737335)
Supplement: rna-10-770-s01.pdf [file rna-10-770-s01.pdf]

## **Supplemental Material to:**

**Ivana Ivančić-Baće, Marin Radovčić, Luka Bočkor,  
Jamieson L. Howard and Edward L. Bolt**

**Cas3 stimulates runaway replication of a ColE1  
plasmid in Escherichia coli and antagonises RNaseHI**

**2013; 10(5)**

**<http://dx.doi.org/10.4161/rna.23876>**

**<http://www.landesbioscience.com/journals/rna/article/23876>**

**Table S1** Primers used in this study.

| Primer    | Sequence (all 5' to 3')      |                                                        |
|-----------|------------------------------|--------------------------------------------------------|
| ygcB-1B   | TGCCATTACTGGGGAAAATCCTCAA    | Deletion of <i>cas3</i> ( <i>ygcB</i> ).               |
|           | AAAGCTCATGTGCAGCTCCATCAGCA   | Sequence for aprR is underlined.                       |
| ygcB-2B   | TCTGGTCATCCCTTCATCCCCTGTATAG | Deletion of <i>cas3</i> ( $\Delta ygcB$ ).             |
|           | GTCCGCCAGATAACAGAAAAGCC      |                                                        |
| ygcB-3    | GCAGCATCGAAAAATAGC           | Verification PCR of $\Delta ygcB$                      |
| ygcB-4    | CGTTTTATTATTAAGAA            | Verification PCR of $\Delta ygcB$                      |
| ygcB-bad2 | CCGGGTACCATAGAACCTTTTAAATAT  | Cloning <i>cas3</i> into pUC19 via KpnI (underlined).  |
| ygcB-Y    | GGAATTCCTTATTTGGGATTTGCAGG   | Cloning <i>cas3</i> into pUC19 via EcoRI (underlined). |
| Cascade-F | GCATATGAAGGTCTAGAAATGAATTT   | Cloning ( <i>casA-casE</i> ) into pUC19.               |
| cascade-R | CATTTTATGGTACCTCAATCACAGTGG  |                                                        |
| casC-F    | GTAAGGAAATCTAGATATGTCTAAC    | Cloning <i>casC</i> into pUC19 via XbaI and KpnI.      |
| casC-R    | CAAATAAGGTACCATGTTCACGCC     |                                                        |

**Table S2.** Plasmid yields in *E. coli* MG1655  $\Delta pcnB$ .

| strain<br>(genotype) <sup>a)</sup> | Plasmid | Plasmid<br>concentration<br>(ng/ $\mu$ L) <sup>b)</sup> | OD <sub>600</sub> | Viability<br>cells per ml<br>( $\times 10^7$ ) | Amp <sup>r</sup> cells<br>(% total) <sup>c)</sup> |
|------------------------------------|---------|---------------------------------------------------------|-------------------|------------------------------------------------|---------------------------------------------------|
|------------------------------------|---------|---------------------------------------------------------|-------------------|------------------------------------------------|---------------------------------------------------|

<sup>a</sup>  $\Delta pcnB$  was generated by P1 transduction into *E. coli* K12 MG1655.

<sup>b</sup> Plasmid concentrations were measured in a Nanovue spectrophotometer (GE Healthcare). Values are means of three independent experiments with standard deviations given in parentheses.

<sup>c</sup> The percentage cells retaining plasmid was measured by comparing viable colony counts after plating on agar with, or without ampicillin. <sup>c)</sup> Viable cell number was from counting colonies after plating 100  $\mu$ l of serially diluted bacteria on LB agar plates from at least two independent experiments.

---

|                                 |                        |                      |                   |                |       |
|---------------------------------|------------------------|----------------------|-------------------|----------------|-------|
|                                 | pUC19                  | 53 ( $\pm$ 0.71)     | 1,67( $\pm$ 0.02) | 40( $\pm$ 1)   | 100.0 |
| IIB955 ( $\Delta$ <i>pcnB</i> ) | pCas3 <sup>+</sup>     | 228.7 ( $\pm$ 51.17) | 1.42( $\pm$ 0.17) | 118( $\pm$ 21) | 25.1  |
|                                 | pCas3 <sup>K320L</sup> | 65.25 ( $\pm$ 3.18)  | 1.67( $\pm$ 0.02) | 97.5( $\pm$ 3) | 100.0 |
|                                 | pCas3 <sup>K78L</sup>  | 165 ( $\pm$ 12.73)   | 0.99( $\pm$ 0.19) | 12.5( $\pm$ 3) | 100.0 |

---
